# Supplementary material for: Resolving the Puzzle of Iris maackii (Iridaceae): A Morphological Insight into Its Taxonomy
Source: MDPI journal article supplement (doi:10.3390/plants12193349), 2023-09-22
Supplement: s1 [file s1]

**Table S4.** Results of the principal component analysis of the morphometric parameters of seeds.

| Parameter     | Components    |              |               |
|---------------|---------------|--------------|---------------|
|               | PC1           | PC2          | PC3           |
| Length (L)    | −0.471        | <b>0.579</b> | <b>0.563</b>  |
| Width (W)     | <b>−0.568</b> | −0.223       | 0.233         |
| Thickness (T) | −0.471        | 0.390        | <b>−0.791</b> |
| L/W ratio     | 0.485         | <b>0.681</b> | 0.051         |

Scores of the variables for the first three main axes are shown. The variables that contributed most for the axes are highlighted in bold.
