# Supplementary material for: Resolving the Puzzle of Iris maackii (Iridaceae): A Morphological Insight into Its Taxonomy
Source: MDPI journal article supplement (doi:10.3390/plants12193349), 2023-09-22
Supplement: s1 [file s1]

**Table S3.** Results of ANOVA and pairwise comparisons between the mean values for each collection site (see Table 1) and the control (*I. maackii*) by the Dunnett's many-to-one test for the morphometric parameters of seeds.

| Pairwise comparisons                                                                        | MD        | Se       | t-value | p-value | LM        | UM        |
|---------------------------------------------------------------------------------------------|-----------|----------|---------|---------|-----------|-----------|
| <b>Seed length (L); ANOVA: <math>F(7,392) = 130.77, p &lt; 0.0001, \eta^2 = 0.70</math></b> |           |          |         |         |           |           |
| <i>I. laevigata</i> -2 – <i>I. maackii</i> = 0*                                             | -0.71600  | 0.08864  | -8.078  | < 0.001 | -0.94948  | -0.48252  |
| <i>I. laevigata</i> -3 – <i>I. maackii</i> = 0                                              | -0.10800  | 0.08096  | -1.334  | 0.643   | -0.32127  | 0.10527   |
| <i>I. laevigata</i> -4 – <i>I. maackii</i> = 0                                              | -0.72400  | 0.09477  | -7.640  | < 0.001 | -0.97362  | -0.47438  |
| <i>I. pseudacorus</i> -5 – <i>I. maackii</i> = 0                                            | 1.51200   | 0.10585  | 14.285  | < 0.001 | 1.23319   | 1.79081   |
| <i>I. pseudacorus</i> -6 – <i>I. maackii</i> = 0                                            | 1.19200   | 0.09880  | 12.064  | < 0.001 | 0.93174   | 1.45226   |
| <i>I. pseudacorus</i> -7 – <i>I. maackii</i> = 0                                            | 0.47200   | 0.10462  | 4.512   | < 0.001 | 0.19642   | 0.74758   |
| <i>I. pseudacorus</i> -8 – <i>I. maackii</i> = 0                                            | 0.18800   | 0.10772  | 1.745   | 0.355   | -0.09576  | 0.47176   |
| <b>Seed width (W); ANOVA: <math>F(7,392) = 496.39, p &lt; 0.0001, \eta^2 = 0.90</math></b>  |           |          |         |         |           |           |
| <i>I. laevigata</i> -2 – <i>I. maackii</i> = 0                                              | -0.47400  | 0.07991  | -5.932  | < 0.001 | -0.68607  | -0.26193  |
| <i>I. laevigata</i> -3 – <i>I. maackii</i> = 0                                              | -0.10600  | 0.07623  | -1.391  | 0.633   | -0.30831  | 0.09631   |
| <i>I. laevigata</i> -4 – <i>I. maackii</i> = 0                                              | -0.17600  | 0.10043  | -1.753  | 0.375   | -0.44252  | 0.09052   |
| <i>I. pseudacorus</i> -5 – <i>I. maackii</i> = 0                                            | 4.00400   | 0.13806  | 29.002  | < 0.001 | 3.63761   | 4.37039   |
| <i>I. pseudacorus</i> -6 – <i>I. maackii</i> = 0                                            | 2.72000   | 0.11812  | 23.027  | < 0.001 | 2.40652   | 3.03348   |
| <i>I. pseudacorus</i> -7 – <i>I. maackii</i> = 0                                            | 2.41400   | 0.09362  | 25.785  | < 0.001 | 2.16554   | 2.66246   |
| <i>I. pseudacorus</i> -8 – <i>I. maackii</i> = 0                                            | 2.79200   | 0.08827  | 31.629  | < 0.001 | 2.55773   | 3.02627   |
| <b>Seed thickness; ANOVA: <math>F(7,392) = 87.09, p &lt; 0.0001, \eta^2 = 0.61</math></b>   |           |          |         |         |           |           |
| <i>I. laevigata</i> -2 – <i>I. maackii</i> = 0                                              | 0.21000   | 0.07508  | 2.797   | 0.0331  | 0.01110   | 0.40890   |
| <i>I. laevigata</i> -3 – <i>I. maackii</i> = 0                                              | 0.14800   | 0.05762  | 2.569   | 0.0618  | -0.00464  | 0.30064   |
| <i>I. laevigata</i> -4 – <i>I. maackii</i> = 0                                              | -0.02800  | 0.06024  | -0.465  | 0.9981  | -0.18760  | 0.13160   |
| <i>I. pseudacorus</i> -5 – <i>I. maackii</i> = 0                                            | 1.34200   | 0.08688  | 15.447  | < 0.001 | 1.11185   | 1.57215   |
| <i>I. pseudacorus</i> -6 – <i>I. maackii</i> = 0                                            | 1.10000   | 0.08318  | 13.225  | < 0.001 | 0.87964   | 1.32036   |
| <i>I. pseudacorus</i> -7 – <i>I. maackii</i> = 0                                            | 0.86200   | 0.06432  | 13.402  | < 0.001 | 0.69160   | 1.03240   |
| <i>I. pseudacorus</i> -8 – <i>I. maackii</i> = 0                                            | 0.58600   | 0.08499  | 6.895   | < 0.001 | 0.36085   | 0.81115   |
| <b>L/W ratio; ANOVA: <math>F(7,392) = 169.05, p &lt; 0.0001, \eta^2 = 0.75</math></b>       |           |          |         |         |           |           |
| <i>I. laevigata</i> -2 – <i>I. maackii</i> = 0                                              | -0.012318 | 0.023652 | -0.521  | 0.996   | -0.074701 | 0.050065  |
| <i>I. laevigata</i> -3 – <i>I. maackii</i> = 0                                              | 0.007178  | 0.020165 | 0.356   | 1.000   | -0.046007 | 0.060364  |
| <i>I. laevigata</i> -4 – <i>I. maackii</i> = 0                                              | -0.093207 | 0.024026 | -3.879  | < 0.001 | -0.156578 | -0.029837 |
| <i>I. pseudacorus</i> -5 – <i>I. maackii</i> = 0                                            | -0.435392 | 0.023964 | -18.169 | < 0.001 | -0.498598 | -0.372186 |
| <i>I. pseudacorus</i> -6 – <i>I. maackii</i> = 0                                            | -0.323667 | 0.022796 | -14.199 | < 0.001 | -0.383792 | -0.263542 |
| <i>I. pseudacorus</i> -7 – <i>I. maackii</i> = 0                                            | -0.383088 | 0.019862 | -19.288 | < 0.001 | -0.435475 | -0.330701 |
| <i>I. pseudacorus</i> -8 – <i>I. maackii</i> = 0                                            | -0.468369 | 0.018903 | -24.777 | < 0.001 | -0.518227 | -0.418511 |

MD, difference in means; Se, standard error of mean; LM, lower margin of 95% confidence interval; UM, upper margin of 95% confidence interval. \* Testing the hypothesis that the difference between the mean values of the variable in a pairwise comparison is zero.
