# Supplementary material for: Resolving the Puzzle of Iris maackii (Iridaceae): A Morphological Insight into Its Taxonomy
Source: Plants (Basel). 2023 Sep 22;12(19):3349. doi: 10.3390/plants12193349 (PMC10574458; doi:10.3390/plants12193349)
Supplement: Supplementary file 1 [file plants-12-03349-s001.zip › Table S1.xlsx]

## Sheet: Лист1
Iris laevigata												Iris pseudacorus
1	3	4	5	6	8	9	10	11	13	14		1	3	4	5	6	8	9	10	11	13	14
2	0	10.5	26	8	5	5	0	2.7	5.8	1.6		3.6	4	0.6	5.2	5.8	14	4	2	4	6.8	2.1
1.7	0	8.8	24	5.2	4	4	0	0.5	6	1.5		2.7	3	0.8	8.6	4.3	12	4	2	3.2	9.1	1.6
1.7	1	9	13.2	4.2	5	3	2	1.5	5.2	1.2		3.9	1	2.5	19.3	5	6	4	2	2.2	8.6	2
2.1	1	6.5	21.2	5	5	3	2	1.8	6.5	1.7		4.3	4	6.1	7.9	5.3	15	4	3	1.8	8.6	1.9
1.6	1	8	20.2	5.7	6	4	2	2.5	7.4	1.5		4.3	4	3.4	7.3	5.5	17	4	3	2.5	8.5	2.1
1.85	0	11.5	27.5	6.2	3	3	0	1.2	5.2	1.5		3.7	3	6.6	10.5	5.8	12	4	2	1.9	8.9	2.1
1.7	0	9.1	21.5	5.4	4	4	0	2.5	7	1.4		3.6	4	4.5	8.3	5.5	11	3	2	2.3	7.5	2
1.9	1	5.5	22	6	5	3	2	2.5	6.3	1.5		3.7	4	9	17.4	6.8	14	4	2	2.6	6	1.7
1.9	0	9	26	5.6	4	4	0	3.3	6.2	1.6		3.2	2	10.5	22.4	6.3	8	4	2	2.2	6.9	2
1.3	1	11.2	19.3	4.7	6	4	2	2.2	7.2	1.5		3.2	3	3.2	10.5	5.4	10	4	2	1.4	7.1	1.7
2	1	6.5	16.8	4.4	6	4	2	1.2	5.4	1.4		3.7	2	8.1	7.2	4.8	10	4	3	1.5	7.3	1.8
1.3	1	7.7	12.2	3.8	6	4	2	1.6	7	1.6		3.3	3	6.8	6.7	5.2	11	4	2	2	7	2.1
1.45	1	7.1	12.6	6	6	4	2	2.8	7.2	1.5		3.5	3	10	10	5.8	12	4	3	1.7	7	1.8
1.45	0	9.5	18.5	6	4	4	0	1.7	5.5	1.3		3.8	3	9.2	7.8	5.6	16	5	3	1.5	8.4	1.9
1.65	1	13	26	5.7	3	3	0	2	8	1.4		3.5	2	7.6	11	6.8	10	5	3	2	8.8	1.8
1.45	0	8.7	8.5	4	5	3	2	1.2	5.5	1.8		2.5	3	0.2	6	5.1	7	4	1	3	7.2	1.8
1.35	1	10	24	5.8	3	3	0	1.7	5.8	1.5		2.5	2	0.5	10.2	5.7	8	2	2	2.5	7.3	1.7
1.85	1	10.7	23.5	4.6	6	4	2	0.5	5.2	1.3		2.7	3	0.5	7.6	5.6	9	4	2	1.7	6.6	1.7
2.35	0	11	19.5	4.1	6	4	2	1.1	5.6	1.2		2.7	3	7.2	12.5	6	11	4	2	2.8	6.8	1.7
2.55	0	8.4	27.5	6.3	4	4	0	3.4	5.6	1.5		2.5	2	7.7	12	5.8	7	4	2	3	8.4	1.7
1.7	0	9	21.7	4.5	6	6	0	3	4.2	1.5		2.2	2	6.4	10.8	5.3	10	3	3	3	7.9	1.6
1.75	1	8	21.6	4.8	3	3	0	3.5	5.5	1.6		3.4	2	0.3	10	6	7	4	2	2.5	7.1	1.5
1.55	1	9.5	23.7	4.5	6	4	2	0.9	5.6	1.4		2.5	2	0.2	7.7	5.3	6	3	2	3	7	1.6
1.85	1	9.1	22.8	5.1	6	4	2	1	5.5	1.6		2.3	2	6.1	11.3	4.6	7	3	2	3.1	6.8	1.8
1.15	0	12.5	15	4.7	5	3	2	1.1	5.7	1.3		2.2	2	0.2	12.9	5.8	6	3	2	2.5	7.7	1.6
1.75	0	4.2	26.2	6.7	4	4	0	2	6.5	1.5		4	2	10.7	26.2	9.2	10	3	3	3	7	1.7
2.1	1	8.6	23.6	5.7	4	4	0	3.5	6.2	1.3		3.5	3	9.8	15.7	7.1	12	4	3	2.2	7.9	2.2
1.5	1		17.7	4.9	7	4	3	2	6.3	1.6		3.7	3	0.2	7	5.5	9	4	2	1.4	7	1.8
1.3	0		28.5	5.5	5	3	2	1	4	1.5		2.5	2	7.8	11.4	5.7	10	3	3	2	7.8	2.2
1.55	1		20.5	5.3	4	4	0	2	6.5	1.6		2.9	3	1.9	7.8	5.7	13	4	3	2.1	6.9	2.2
1.25	1		20.5	5.1	6	4	2	2	6.5	1.5		3.5	3	12	24.2	9.8	12	4	2	2.7	6.5	1.8
1.45	1		23.8	5.2	5	3	2	1	6	1.5		3.6	4	4.6	8.2	4.8	11	4	2	2.1	7.9	2
2.7	0		17.2	4.5	6	4	2	2.2	5.5	1.5		3.7	3	10.4	24.4	6.5	9	3	2	2.4	7.6	2
1.5	1		13.7	4	3	3	0	1.5	5	1.4		2.8	3	8.5	13.4	6.2	12	4	3	3.4	7.2	1.9
1.6	1		13.8	4	5	3	2	1.7	5	1.5		2.7	3	6.2	13	6.6	13	4	3	2.7	7.4	1.9
1.35	0		20.7	4.7	7	4	3	2.2	6	1.4		3.5	2	5.7	11.6	6	9	4	3	2.5	7.3	1.9
1.3	0		25.6	5	4	4	0	1.8	6.3	1.4		2.2	3	0.3	6.5	4.3	10	4	2	2.1	8.6	1.8
1.5	0		13.5	5.2	4	4	0	2.7	6.5	1.5		2.8	2	0.3	5.7	4	8	4	2	2.2	7.9	1.7
1.6	0		22	7.7	3	3	0	2.8	8	1.3		2.7	2	0.4	5.9	4.2	8	4	2	2.4	7.8	1.8
1.55	0		20	5.3	4	4	0	1.5	6.5	1.4		2.8	3	0.5	5.3	4.2	10	4	2	2.3	8.6	2
1.15	0		16.5	7.2	3	3	0	2.6	7	1.5		2.7	3	4.5	7.5	5.6	13	3	3	3.6	8.1	1.9
2.9	0		22	6.5	4	4	0	1.7	7.5	1.3		2.6	2	0.2	8.6	5.3	8	5	2	2.7	7.5	2
1.85	0		20	6.5	4	4	0	1.8	8	1.7		3.6	3	1.8	7	5.8	13	4	3	4	8.6	2.4
1.6	0		20.5	6.8	4	4	0	2.1	6.4	1.7		2	1	7	22.5	6.6	6	4	2	3.5	7.9	2.1
1.9	0		18	5	3	3	0	1.8	6.2	1.7		3.2	2	6.2	11.4	6.2	8	4	2	3	9.5	1.8
1.45	0		19.5	5.5	4	4	0	2.8	7.2	1.7		2.4	2	5	8	6	8	4	2	2.7	7.7	1.6
1.7	0		10	8	3	3	0	2.2	6	1.7		3.1	3	8.5	14.2	7.1	14	4	3	4	7.7	1.6
2	1		14.5	6	4	4	0	2	5.5	1.6		3	2	6.2	12.8	5.8	10	5	3	3.5	6.9	1.9
1.9	0		14.2	6.5	6	4	2	1.5	6.8	1.5		2.5	3	4.8	7	4.7	11	4	2	3.3	7	1.9
2.05	0		17.8	4.5	4	4	0	1.8	7	1.6		3.6	3	10.2	18.2	8	14	4	3	4.8	7.8	2
1.6	0		17	6.2	4	4	0	2.8	7	1.4		2.8	3	11.6	19	6	13	5	3	4	7.7	1.8
2.1	0		21.8	7	4	4	0	2	5.5	1.5		1.3	2	3.8	9	4.4	7	4	2	1.8	7.1	1.9
2	0		16.5	6.1	4	4	0	1.8	7.5	1.6		2	2	0.2	4.7	4.1	5	3	1	2	8	1.6
2.25	0		17.2	9.5	4	4	0	2.3	6.5	1.4		2.1	2	7.5	19.8	6	8	3	2	2.8	7	2
1.85	0		21	5.2	3	3	0	1.8	6.3	1.8		2.5	3	3	5.9	4.8	9	4	2	2	6.8	1.7
1.45	0		10.5	5.6	3	3	0	1.8	6	1.8		1.9	3	1.8	5	4.2	6	3	1	1.5	7.3	1.8
1.25	0		19.8	6.5	3	3	0	1.5	5.2	1.8		2.4	3	0.5	7	6.5	12	2	2	2.9	8	1.6
1.15	0		15.5	6.1	3	3	0	3	6.8	1.8		2.1	2	5.6	6	4.8	7	4	2	3.1	7.5	1.5
1.35	0		11.6	5	4	4	0	2.4	6.4	1.8		2	2	1	6.5	5	7	3	2	3.1	7	2
0.85	0		20.5	5	3	3	0	2.5	7	1.7		2.6	2	6.6	9.2	5.2	10	3	3	2	8.7	1.9
1.6	1		19	6.3	3	3	0	3.5	7.6			4	3	0.8	9.4	5.6	9	4	2	1.9
1.8	0		20	5.6	3	2	1	2.5	5.7			4.4	3	0.2	6	5.2	9	3	2	2.7
1.55	0		14	5.8	4	4	0	1.7	6.5			2.4	3	4.3	10.6	6.5	9	3	2	3.4
1.7	0		15.5	6.2	3	3	0	3.7	5.5
2.6	0		14.5	6.4	3	3	0	4	7.2
1.3	0		23	5.1	4	4	0	2.3	7.5
1.3	0		15.5	5	4	4	0	3	6.5
2.35	1		21	6.1	3	3	0	2.7	7.2
1.45	0		19.5	7.2	6	4	2	1.8	7
1.6	0		12	5.8	2	2	0	1.7	4.2
2.1	1		19	6.3	4	4	0	1.8	6.6
1.65	0		20	10	3	2	1	2.3	6
1.15	0		8.7	7.5	4	4	0	4.2	5.8
	0		20	6	4	4	0	2	8
	0		16.5	8.1	3	3	0	1.8	6.2
	0		17.5	4.5	4	4	0	2.9	6
	0		20	7.5	4	4	0	1.7	5.6
	1		15.5	6.7	3	3	0	1.7	6.7
	0		12	7.5	4	3	1	2.7	6.6
	0		12.5	6	3	3	0	1.5	6
	1		10	5.5	5	5	0	1.8	7.2
	0		21.5	4.5	4	3	1	1.7	4.5
	0		20.5	6.5	4	4	0	2.5	5.4
	0		24.5	5.7	1	1	0	1.8	6
	0		17.5	8.2	4	4	0	3.5	6
	0		19.5	8.2	4	4	0	2.8	5.5
	1		15.5	7	3	3	0	3.5	6.5
	0		11.3	5.5	4	2	2	1.8	7.5
	0		22.5	5.2	4	4	0	2.1	6
	0		19	6	4	4	0	2	7.7
