# Supplementary material for: Resolving the Puzzle of Iris maackii (Iridaceae): A Morphological Insight into Its Taxonomy
Source: Plants (Basel). 2023 Sep 22;12(19):3349. doi: 10.3390/plants12193349 (PMC10574458; doi:10.3390/plants12193349)
Supplement: Supplementary file 1 [file plants-12-03349-s001.zip › Table S2.xlsx]

## Sheet: Лист1
(1) Iris maackii					(2) I. laevigata					(3) I. laevigata					(4) I. laevigata					(5) I. pseudacorus					(6) I. pseudacorus					(7) I. pseudacorus					(8) I. pseudacorus
L	W	T	L/W		L	W	T	L/W		L	W	T	L/W		L	W	T	L/W		L	W	T	L/W		L	W	T	L/W		L	W	T	L/W		L	W	T	L/W
7.2	4.6	1.8	1.56		6.1	4.9	3.6	1.24		6.8	5.8	1.7	1.17		6.5	4.9	2	1.33		9.1	9.4	3.2	0.97		8.9	8.5	2.9	1.05		7.8	7.9	2.7	0.99		8.1	7.9	2.8	1.02
7.2	5.4	1.6	1.33		6.6	4.6	2.6	1.3		6.7	5	1.9	1.34		5.6	4.7	1.7	1.19		8	9.9	3.3	0.8		7.6	8	3	0.95		7.1	7.7	2.4	0.92		7.8	8.5	2	0.92
7.2	5	1.7	1.44		5.9	4.3	2.4	1.37		6.8	4.9	2	1.39		6.5	5	2.1	1.3		9.5	6.9	3.9	1.38		7.8	8.3	3	0.94		7	7.4	3.1	0.95		7.4	7.9	2.3	0.94
7.4	5.3	1.6	1.39		5.9	4.3	2.6	1.37		7.2	5	2.3	1.44		5.6	4.7	1.9	1.19		8.5	9	3.6	0.94		8.4	8.5	3.7	0.99		8.9	8.3	2.5	1.07		6.6	7.5	3.4	0.88
7.3	6.5	1.8	1.12		6.3	5	1.8	1.26		7.3	4.7	2.5	1.55		5.4	4	2	1.35		8.4	9.9	2.8	0.85		7.8	7.4	2.7	1.05		8.3	8.2	2.7	1.01		7	8	2.5	0.87
7.4	5.3	1.7	1.39		6.5	4.9	2.6	1.33		7.3	5.8	1.7	1.26		6.3	5.8	1.7	1.1		7	8	2.7	0.88		7.9	5.6	3.2	1.41		7.2	7.2	2.9	1		7	8.5	2.3	0.82
7.4	5.2	1.6	1.42		6.2	5.1	1.8	1.22		7.3	4.6	2.5	1.59		6.7	4.9	2	1.37		8.7	9.6	2.9	0.9		8.3	8.8	2.8	0.94		7.7	7.5	2.5	1.03		8.1	7.6	2.6	1.06
7.2	5.1	1.7	1.41		6.7	5.4	2	1.24		6.3	4.7	2.5	1.34		5.7	4.3	1.9	1.33		7.5	8.6	3	0.87		8.2	7.6	2.9	1.08		7.5	7.3	2.4	1.03		7.9	7.8	2.8	1.01
7.5	5.4	1.7	1.39		6.1	4.5	1.9	1.36		6.9	5	2.4	1.38		6.6	4.8	1.8	1.38		8.3	9.2	2.7	0.9		7.3	8.1	2.9	0.9		6.9	7.2	2.9	0.96		7.7	8.1	2	0.95
7.2	5.1	1.8	1.41		5.9	4.2	1.6	1.4		7	5.3	2.4	1.32		6.7	4.6	2.1	1.46		8.2	9.4	3.3	0.87		8.1	7.9	2.9	1.03		6.6	7.4	3.1	0.89		7.1	8.5	2.4	0.83
7.4	5.5	1.7	1.35		6.4	3.8	2	1.68		6.7	4.8	2.2	1.4		6.9	5.2	2.2	1.33		8.5	9	3.7	0.94		8.4	8.4	2.8	1		7.9	7.8	2.7	1.01		7.1	7.5	3.1	0.95
7.2	4.7	1.9	1.53		6	4.6	2.6	1.3		7	5.4	1.9	1.3		5.2	4.2	1.6	1.24		7.8	9.7	3.1	0.8		9.2	7.3	3.8	1.26		7.6	7.7	2.9	0.99		6.7	8	2.8	0.84
6.7	4.8	1.7	1.39		6.9	4.3	2.2	1.6		6.5	5.4	1.9	1.2		5.6	4.3	1.9	1.3		9.2	9.5	2.7	0.97		8.7	8.3	2.5	1.05		6.4	6.3	2.5	1.01		7.6	7.9	2.4	0.96
6.9	5.1	1.6	1.35		5.9	4.4	2.2	1.34		6.9	5	1.9	1.38		6.7	4.7	2.1	1.43		8.1	9.6	3.2	0.84		7.8	8.3	3.5	0.94		7	7.6	2.3	0.92		6.9	8.4	2	0.82
7.2	5.1	1.8	1.41		6.2	4.8	1.9	1.29		6.9	4.9	2.2	1.41		6.2	4.8	2.1	1.29		8	6.3	3.3	1.27		8.9	8.2	3.2	1.09		7.1	7.4	2.8	0.96		7.4	7.4	2.7	1
6.8	4.9	2.3	1.39		6.5	4.3	2.1	1.51		7.1	4.8	2	1.48		5.2	4.1	1.4	1.27		9.3	9.7	2.9	0.96		8.4	8	2.5	1.05		6.9	7.7	2.9	0.9		6.5	7	3.2	0.93
6.5	5.6	2	1.16		6.9	4.9	2.1	1.41		6.9	4.6	2	1.5		5.6	4.6	1.8	1.22		8.6	8.9	3.2	0.67		8.7	8.1	2.6	1.07		8.7	8.4	2.6	1.04		6.4	8.2	1.9	0.78
6.5	4.3	2.1	1.51		6.8	5.2	2	1.31		7.2	4.9	1.9	1.47		5.9	5	1.5	1.18		8.7	9.6	4	0.9		7.9	8.7	3.2	0.91		7.3	7.6	2.4	0.96		6.9	8.4	2.3	0.82
6.4	4.3	2.3	1.49		5.7	4.6	2.5	1.24		6.7	4.8	2.2	1.4		6.4	6.5	2.3	1		8.4	10.3	3.5	0.82		7.8	7.4	3.1	1.05		7.1	7	3.1	1.01		6.8	7.3	1.9	0.93
7.2	5.2	1.8	1.38		6.3	4.6	1.8	1.37		6.9	4.7	2	1.47		5.6	4.8	2.3	1.17		8.7	9.5	3	0.92		8.3	6.9	3.9	1.2		7.7	8	2.6	0.96		6.9	7.3	2.8	0.94
7	4.9	2	1.43		5.9	4.2	2.5	1.4		6.5	5	2	1.3		5.8	4.4	2	1.32		8.7	10.3	3.1	0.84		7.9	8.7	2.5	0.91		7.7	7.6	2.9	1.01		6.6	8.5	2.6	0.78
6.7	4.7	1.8	1.43		4.5	4.3	2.2	1.05		6.9	5.7	2.1	1.21		6.3	4.6	2	1.37		8.7	8.8	4.7	0.99		8.3	8.1	2.5	1.02		7.2	7.5	3.5	0.96		7	8.4	1.8	0.83
7.2	5.3	1.7	1.36		6.1	4.2	3.1	1.45		6.9	4.8	2	1.44		6.6	5.6	1.8	1.18		8.6	8.9	3.5	0.97		8.7	8.3	2.9	1.05		7.3	7.8	2.4	0.94		6.7	7.2	3.3	0.93
6.7	4.7	1.7	1.43		6.5	5.3	2.3	1.23		6.6	4.9	2.4	1.35		6.6	4.5	2.5	1.47		8.5	9.8	3.1	0.87		7.8	8	2.4	0.98		8.1	7.6	2.7	1.07		7.8	8.2	2.4	0.95
7.2	5	1.9	1.44		5.8	3.8	1.7	1.53		6.5	4.6	2.3	1.41		6.6	4.9	1.7	1.35		9.6	7.7	4.2	1.25		8.5	8.2	2.9	1.04		7.9	7.6	2.8	1.04		6.9	7.5	2.5	0.92
7.2	5	2.1	1.44		6	4.4	1.5	1.36		6.4	4.5	1.9	1.42		6.5	5.4	1.6	1.2		8.1	9.4	2.6	0.86		7.9	8.2	2.4	0.96		8.3	7.2	3.2	1.15		6.7	8.3	2.2	0.81
6.5	5.2	1.7	1.25		6.2	4.2	1.8	1.48		6.8	4.8	1.7	1.42		6.9	5	2.1	1.38		8.7	9.7	3	0.9		8.4	8.5	2.9	0.99		7.4	7.4	2.4	1		6.2	7.5	2.5	0.83
6.1	4.8	2.1	1.27		6	4.8	2	1.25		6.7	4.9	2.1	1.37		6.2	6.2	1.4	1		8.7	8.6	4.2	1.01		7.7	7.8	3.2	0.99		7.4	7.2	3.2	1.03		7.8	7.8	1.7	1
7.1	4.6	2.2	1.54		6.4	4.3	2.2	1.49		6.3	4.7	2.3	1.34		6.7	5.2	1.8	1.29		8.1	9	2.7	0.9		8.3	8.2	3	1.01		7	7.4	3.1	0.95		7	8.2	1.8	0.85
6.4	5.2	2.1	1.23		6.5	4.6	2	1.41		6.6	4.9	1.9	1.35		6.1	5.4	1.7	1.13		8.1	9.8	3.1	0.83		7.7	7.8	3.7	0.99		7	7.3	2.7	0.96		6.5	8	1.8	0.81
7.3	4.8	1.5	1.52		6.5	5.1	2.3	1.27		6.9	4.6	1.9	1.5		6.2	4.7	1.8	1.32		8.9	10.2	3.1	0.87		8.9	6.9	4.2	1.29		8.1	7.7	2.8	1.05		7.4	7.8	2.2	0.95
7.1	5.1	2	1.39		6.3	4.9	1.8	1.29		6.8	5	1.7	1.36		6.7	4.8	1.8	1.4		9.5	7.9	3	1.2		8.7	6.9	3.1	1.26		6.7	7.8	3.3	0.86		6.8	8.1	3.5	0.84
7	4.8	2.2	1.46		6.3	4.2	1.6	1.5		6.8	5.3	1.8	1.28		6.6	5	1.7	1.32		8.6	9.6	3.1	0.9		8.2	8.2	3.1	1		6.7	7.2	2.7	0.93		6.8	8.5	2	0.8
6.8	5.6	2.3	1.21		5.9	4.3	2.3	1.37		6.1	5.4	1.8	1.13		6.2	4.5	1.8	1.38		8.1	9.6	3.1	0.84		7.7	7.8	2.3	0.99		6.4	7.1	3.3	0.9		8.3	8.4	3.9	0.99
5.7	4.7	2.3	1.21		6	4.7	2.4	1.28		7.5	5.3	2.2	1.42		6.8	5.2	2	1.31		7.9	9.3	2.6	0.85		6.9	7.5	3.5	0.92		7	7.9	2.9	0.89		7.4	8	3.1	0.92
6.2	5.5	2.4	1.13		6	4.6	1.7	1.3		7.3	5	1.9	1.46		5.2	5.2	1.9	1		8.6	9.4	4.2	0.91		8.7	8	2.4	1.09		7.6	8	2.2	0.95		7.3	7.7	3	0.95
7	4.6	2.2	1.52		6.8	4.7	2.2	1.45		7	5.1	1.6	1.37		6.3	4.5	1.7	1.4		8	9.8	3.9	0.82		9.1	7.8	3.3	1.17		7	7.2	3.3	0.97		7	7.2	2.2	0.97
7.2	5.1	1.8	1.41		5.9	4.4	2.7	1.34		6.4	4.3	1.9	1.49		6.2	4.8	1.9	1.29		8	9.2	2.9	0.87		6.9	8	3	0.86		7.2	7.4	2.9	0.97		6.9	7.1	2.9	0.97
7.3	5.4	1.7	1.35		6.8	5	1.7	1.36		6.2	4.9	2.1	1.27		5.8	5.1	1.6	1.14		8.5	8.1	3.6	1.05		7.8	8.1	3.1	0.96		7	7	2.7	1		7.6	7.4	2.4	1.03
7.1	5.1	1.8	1.39		6.5	5	1.6	1.3		7.3	5.5	2.2	1.33		6.6	4.9	1.9	1.35		8.3	9.7	3.4	0.86		8.3	8.6	2.8	0.97		6.7	7.1	2.7	0.94		8.7	8.2	2.9	1.06
6.2	5	1.8	1.24		6.5	3.9	2.3	1.7		7.1	4.8	1.9	1.48		6.2	4.4	1.6	1.41		7.4	8.5	2.4	0.87		8.2	6.7	3.3	1.22		8.2	8.1	2.5	1.01		7.8	7.5	2.3	1.04
6.9	4.9	2	1.41		5.9	5.1	1.8	1.16		7.2	5	2.4	1.44		6.3	6.6	2.1	0.95		9.1	8.7	3.5	1.05		7.7	7.5	2.6	1.03		7.7	8	3	0.96		6.5	6.9	2.6	0.94
6.7	5.1	1.8	1.31		5.9	4.5	1.8	1.31		6.7	4.6	2.3	1.46		5.5	4.4	1.5	1.25		8.1	9.1	2.3	0.89		7.6	6.1	4.5	1.25		8	7.3	2.3	1.1		7.1	7.6	2.3	0.93
5.3	3.7	3.5	1.43		5.9	4.7	1.9	1.26		6.8	4.8	2.2	1.42		6.2	4.4	1.8	1.41		8.7	9.2	3.7	0.95		7.7	8	3.1	0.96		7	7.5	2.6	0.93		6.3	8.2	2.1	0.77
6.6	5.2	1.9	1.27		6.2	4.4	2.7	1.41		7.1	4.6	1.7	1.54		6.7	4.5	2.8	1.49		8.1	8.4	3.1	0.96		7.6	7.2	2.2	1.06		7.3	7.4	2.6	0.99		6.4	7.7	2.3	0.83
6.8	4.8	1.7	1.42		6	4.8	2	1.25		6.1	4.7	2.2	1.3		6.4	4	2.2	1.6		9.6	7.1	3.6	1.35		7.4	7.3	2.4	1.01		7	7.2	3.2	0.97		6.9	8	3.1	0.86
7.2	5.3	1.8	1.36		6.5	4.3	1.8	1.51		6.7	4.5	1.9	1.49		6.7	5.6	2.2	1.2		8.1	9.4	3.2	0.86		8	6.4	3.3	1.25		8	6.8	3.1	1.18		5.6	7.6	1.7	0.74
7.3	5.2	2	1.4		6.1	4.3	2.4	1.42		6.5	4.5	2.4	1.44		6	4.5	2	1.33		7.8	7.7	4.3	1.01		7.9	7.2	3.6	1.1		6.8	7.2	3.2	0.94		7.6	7.8	2.5	0.97
7.3	5.2	1.9	1.4		6.8	4.1	2.4	1.66		6.6	4.8	2.4	1.38		5.9	4.5	1.5	1.31		8.7	9.3	3.1	0.94		8.4	7.5	2.9	1.12		7.4	7.4	2.3	1		6.8	6.8	2.9	1
7	5.1	2	1.37		5.6	4.5	1.6	1.24		6.8	5.1	2.2	1.33		6	4.5	1.9	1.33		7.2	8	2.9	0.9		8.2	6.2	2.9	1.32		7.7	5.2	2.7	1.48		7	7.8	2.7	0.9
